# Supplementary material for: Leaky waveguide biosensors for label-free measurement of human serum albumin
Source: Royal Society of Chemistry journal article supplement (doi:10.1039/d5an00108k), 2025-01-01
Supplement: d5an00108k1.pdf [file d5an00108k1.pdf]

## Leaky Waveguide Biosensors for Label-free Measurement of Human Serum Albumin

Anil Kumar Pal<sup>a, d</sup>, Md Nazmul Hossain<sup>b, e</sup>, Saverio Brogna<sup>b</sup>, Nicholas J. Goddard<sup>c</sup>, and Ruchi Gupta<sup>a\*</sup>

<sup>a</sup>: School of Chemistry, University of Birmingham, Birmingham, B15 2TT, UK.

<sup>b</sup>: School of Biosciences and Birmingham Centre of Genome Biology, University of Birmingham, B15 2TT UK.

<sup>c</sup>: Not Applicable.

<sup>d</sup>: Department of Physics and Nanotechnology, College of Engineering and Technology, SRM Institute of Science and Technology, Kattankulathur, Chennai 603203, Tamil Nadu, India.

<sup>e</sup>: Department of Microbial Biotechnology, Faculty of Biotechnology and Genetic Engineering, Sylhet Agricultural University, Sylhet 3100, Bangladesh.

\*: Corresponding author ([r.gupta.3@bham.ac.uk](mailto:r.gupta.3@bham.ac.uk))

### Supplementary Information

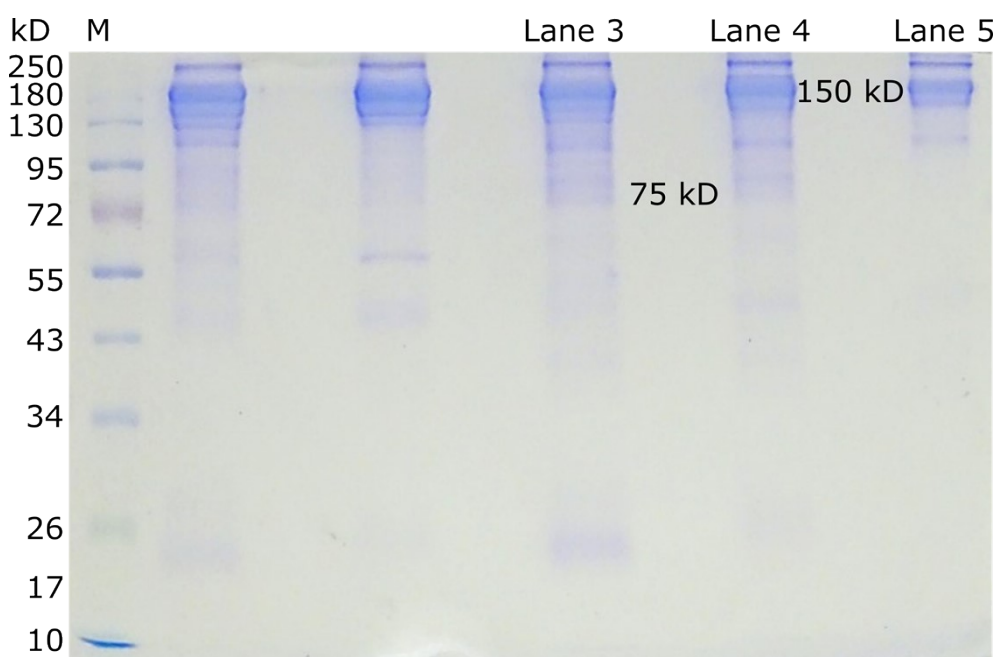

Figure S1: SDS-PAGE analysis where lanes 3-4 and 5 show the results of antibody solutions treated with 2-MEA and untreated, respectively. 'M' stands for molecular weight marker.
